# Supplementary material for: Temperate Mountain Forest Biodiversity under Climate Change: Compensating Negative Effects by Increasing Structural Complexity
Source: PLOS journal article supplement (doi:10.1371/journal.pone.0097718), 2014-05-13

**Figure S2 a-d:** Predicted probability of capercaillie presence for current (2010, black) and future (2050, grey) climate conditions, modeled in dependence of species-relevant vegetation variables, while holding all other variables at their empirical sampling average. For variable codes see Table 2.

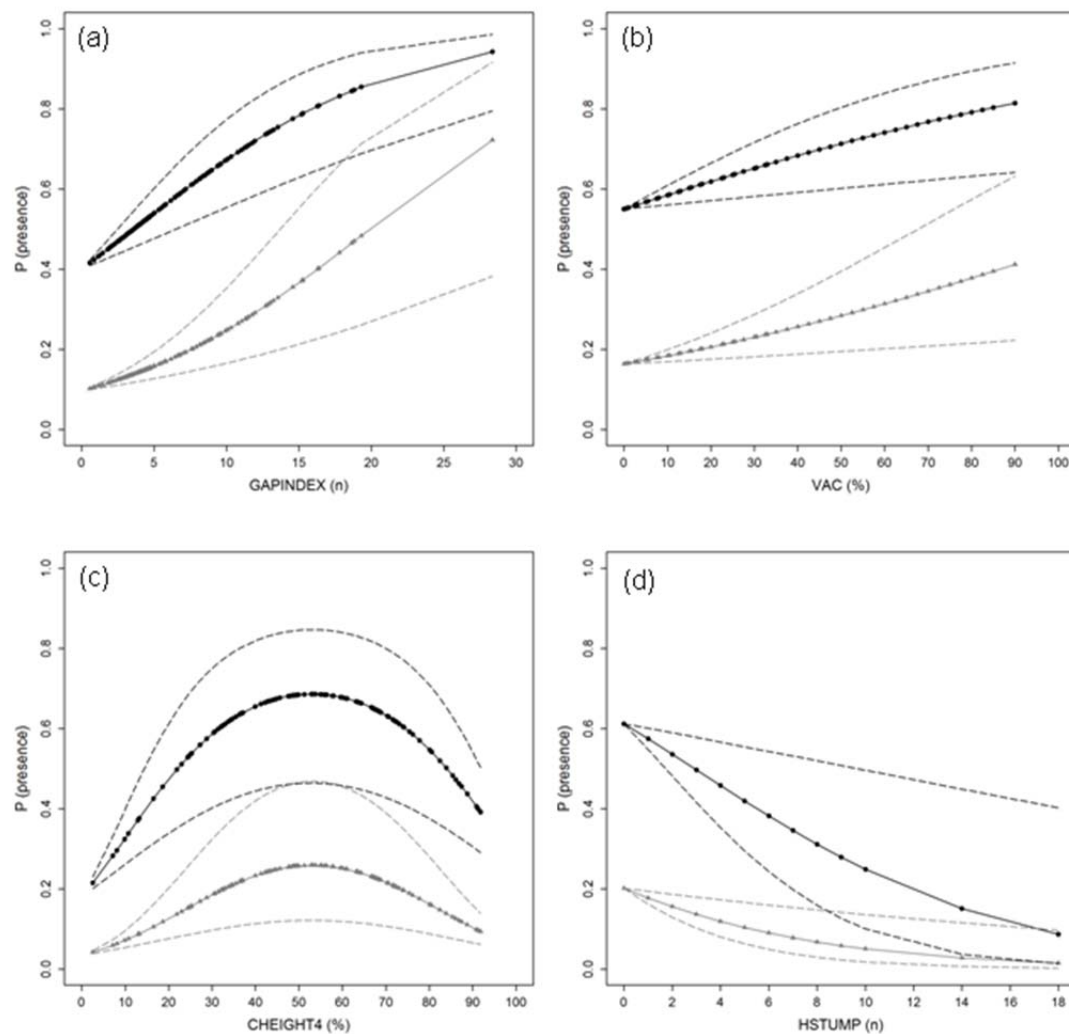

Supplement: S2 (10.1371/journal.pone.0097718.s002) [file journal.pone.0097718.s002]
